# Supplementary material
Source: publisher figshare collection journal article supplement (https://tandf.figshare.com/ndownloader/files/13078649)
Supplement: Supplementary file 1 [file 13078649]

**Supplemental Figures**

Figure S1. Mechanism of filter-aid operation on filter media in filter press system

Figure S2. Photograph of the KUO2PO4 particle cake formed on cloth media in a filter press system.


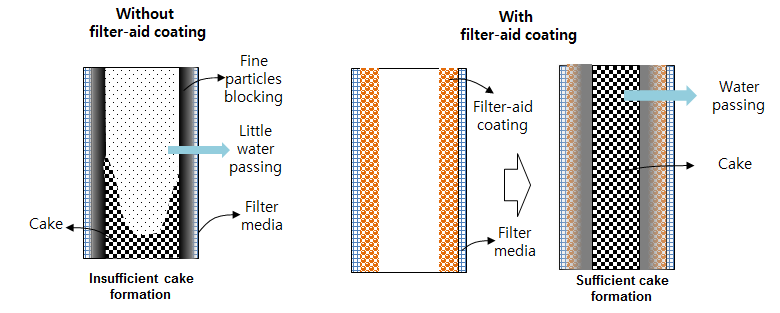


Figure S1. Mechanism of filter-aid operation on filter media in filter press system


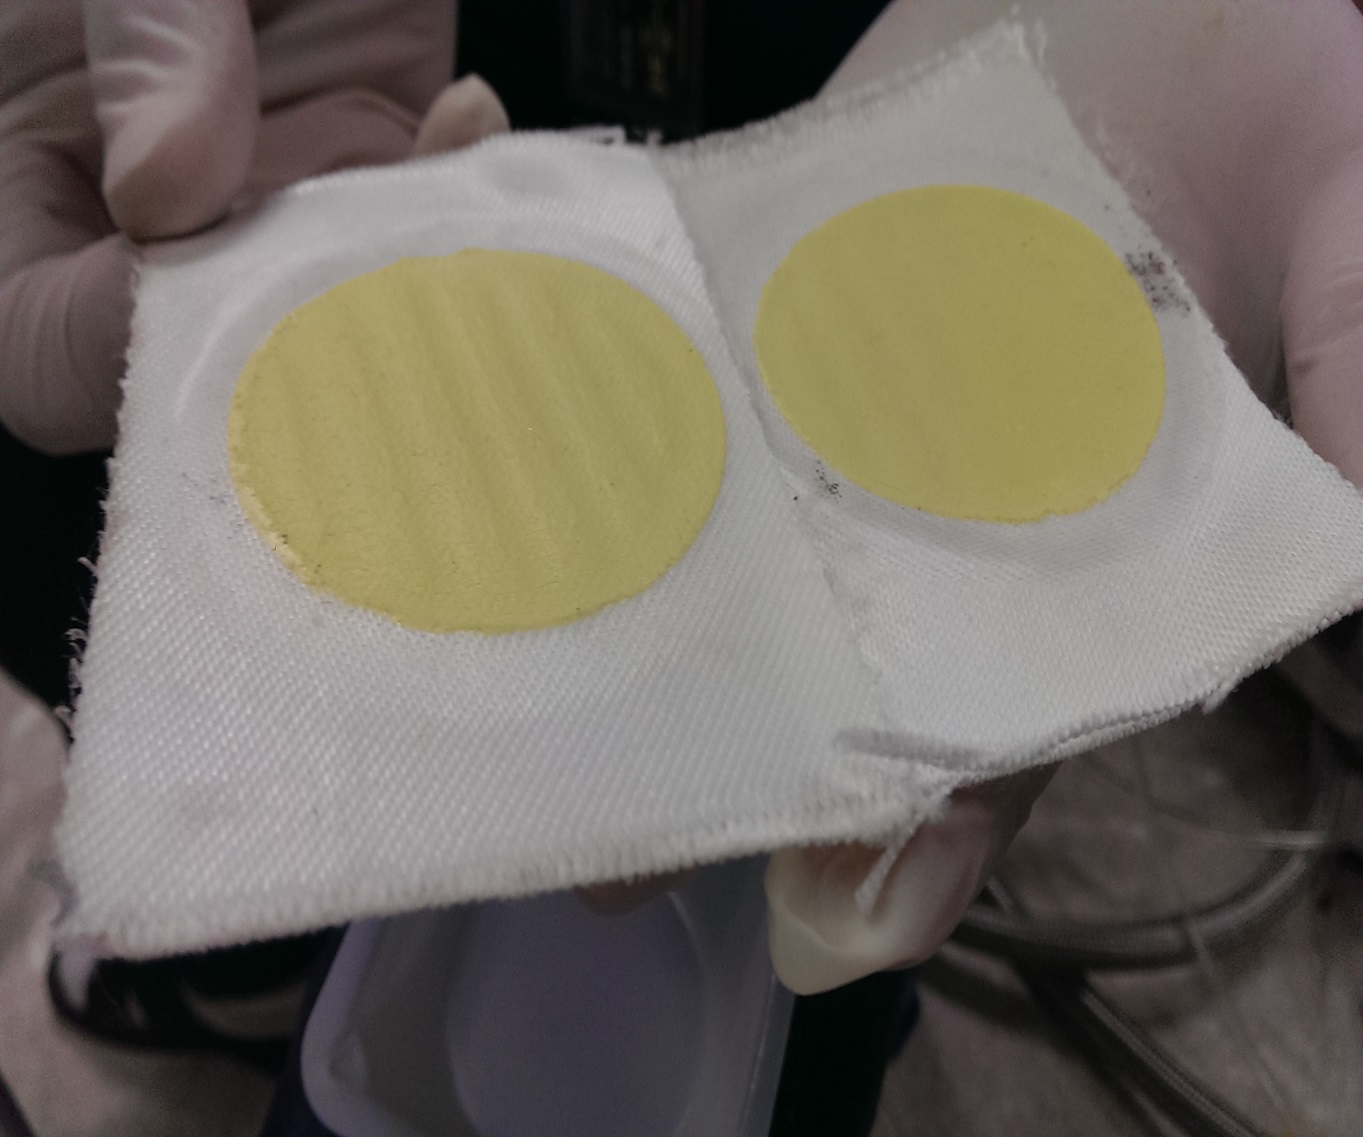


Figure S2. Photograph of the KUO2PO4 particle cake formed on cloth media of a filter press system.
